# Supplementary material
Source: Research Square preprint supplement (doi:10.21203/rs.3.rs-9951228/v1)
Supplement: Supplementary file 1 [file 98e9e3e0d952c52b58c4e645.docx]

**S2.1 CI Index Grading Standard and Calculation Formula**

The severity of chilling injury (CI) was classified into grades 0–5 based on the percentage of water-soaked spots and depressed areas on the fruit surface: grade 0 (0%), grade 1 (≤10%), grade 2 (11%–20%), grade 3 (21%–30%), grade 4 (31%–40%), and grade 5 (41%–50%). Twenty fruits per replicate were evaluated at each time point. The CI index was calculated using the following formula:

CI index = Σ (CI grade × number of fruits in that grade) / (5 × total number of evaluated fruits)

**S2.2 Texture Analyzer Parameters**

A P/2 cylindrical probe was equipped, and fruits were cut into 1.5 cm³ cubes. Instrument parameters: pre-test speed 2.0 mm/s, test speed 1.0 mm/s, return speed 8.0 mm/s, compression distance 6.0 mm, trigger force 6 g, with three replicates per sample.

**S2.3 Detailed Procedures for TEM Sample Preparation and Observation**

One fruit was taken from each replicate at each time point, and three small pieces (approximately 1 mm³) of subcutaneous pulp tissue at the equatorial region were excised and immediately fixed in pre-cooled 2.5% (v/v) glutaraldehyde in 0.1 M phosphate buffer (pH 7.4) at 4℃ for 24 h. After rinsing three times with the same buffer (15 min each), samples were post-fixed with 1% (w/v) osmium tetroxide in 0.1 M phosphate buffer at room temperature in the dark for 2 h. Samples were dehydrated through a graded ethanol series (30%, 50%, 70%, 90%, 100%) and acetone (15 min per step), infiltrated with Spurr's resin-acetone mixture (1:1, v/v) overnight, and polymerized in pure resin at 60℃ for 48 h. Ultrathin sections (70–90 nm) were prepared using an EM UC7 ultramicrotome (Leica, Wetzlar, Germany), stained with uranyl acetate and lead citrate, and observed at an accelerating voltage of 80 kV.

**S2.4 Definitions of Related Enzyme Activity Units**

Enzyme activity unit definitions: One unit (U) of SOD activity was defined as the amount of enzyme required to inhibit 50% of the photochemical reduction of nitroblue tetrazolium; one unit of CAT activity was defined as the amount of enzyme required to decompose 1 μmol H₂O₂ per minute; one unit of POD activity was defined as the amount of enzyme required to catalyze the oxidation of 1 μmol guaiacol per minute; one unit of APX activity was defined as the amount of enzyme required to oxidize 1 μmol AsA per minute; one unit of GR activity was defined as the amount of enzyme required to oxidize 1 nmol NADPH per minute; one unit of DHAR activity was defined as the amount of enzyme required to produce 1 nmol AsA per minute; one unit of MDHAR activity was defined as the amount of enzyme required to oxidize 1 nmol NADH per minute. All results were expressed as U kg⁻¹.

One unit of PLA1/PLA2 activity was defined as the amount of enzyme required to hydrolyze 1 nmol lecithin to produce 1 nmol free fatty acid per minute; one unit of PLD activity was defined as the amount of enzyme required to hydrolyze 1 nmol lecithin to produce 1 nmol choline per minute; one unit of LOX activity was defined as the amount of enzyme required to catalyze the oxidation of 1 μmol linoleic acid per minute; one unit of LPS activity was defined as the amount of enzyme required to hydrolyze triglycerides to produce 1 nmol free fatty acid per minute. All results were expressed as U kg⁻¹.

**S2.5 Detailed Parameters for Fatty Acid Composition Determination**

A 0.5 g frozen green pepper pulp sample was subjected to hydrochloric acid-methanol hydrolysis, n-hexane extraction, and boron trifluoride-methanol methylation before instrumental analysis. Separation was performed using a DB-FFAP capillary column (30 m × 0.25 mm × 0.25 μm). Injector temperature: 250℃; carrier gas: high-purity helium; flow rate: 1.0 mL/min; injection volume: 1 μL; split ratio: 10:1. Temperature program: initial temperature 100℃ held for 1 min, increased to 200℃ at 10℃/min and held for 2 min, then increased to 240℃ at 5℃/min and held for 5 min. Ion source temperature: 230℃; electron impact energy: 70 eV; scan range: m/z 50–500.

**S2.6 Detailed Parameters for PC and PE Content Determination**

A 1.0 g frozen green pepper pulp sample was subjected to total lipid extraction with chloroform-methanol (2:1, v/v) and acetone precipitation before instrumental analysis. Separation was performed using a silica gel column (250 mm × 4.6 mm, 5 μm). Mobile phase: acetonitrile-methanol-phosphoric acid (80:20:0.1, v/v/v); flow rate: 1.0 mL/min; detection wavelength: 205 nm; column temperature: 30℃; injection volume: 20 μL.

**Supplementary Table S2.7 The primer sequences used for RT-qPCR analysis**.

| **Gene name** | **Gene ID** | **Primer sequence ( 5’-3’)** |
| --- | --- | --- |
| CaACTIN | LOC-107867450 | AGAGCACCCCCTCGTTGTAGA  GGTGGTGCCAATCTACGAGGG |
| CaSOD | LOC-107843219 | CAGGAGGCGTTCAAGGTCATC  TCCACCACCATTGCCAGTTC |
| CaCAT | LOC-107857634 | GTGGAGGCTGAAGCTGCTAA  CACCAACCCATCCGTCTCTC |
| CaPOD | LOC-107849876 | GCTGGTGTTGCTGCTCTTTG  CCAACACCACGATCGTCCTT |
| CaAPX | LOC-107853422 | GATGCTGCTGAGAAGCTGGA  CCAGCTTCTCAGCAGCATCC |
| CaDHAR | LOC-107851234 | GCCTCAAGACCAACGGTGAC  TGCTTGATGTGCTCGTTGCT |
| CaMDHAR | LOC-107846789 | AAGCTCCGAGAGGTGGAGAA  TCCATCGTCCTTGACCACCT |
| CaGR | LOC-107848901 | AGCAGCAGGTTCCAGAAGGT  TTGCCTTCACCTTCAGCCTC |
| CaPLA1 | LOC-107865432 | GCTGCTGCTACTGCTGGATT  AGTAGCCGCCAACATCACCT |
| CaPLA2 | LOC-107858765 | TGCCTTCGTCTTCCTCTCCA  AAGCCAAACACCACGACCAC |
| CaPLD | LOC-107862109 | CCAAGGAGGTGCTGAAGGAG  TGGTGGAGGAGGTGATGAGG |
| CaLOX | LOC-107847654 | TGGCTACCTGGCTGTCTCTC  CATCACCACCACCAACACCA |
| CaLPS | LOC-107859876 | CTGGAGGAAGAGGACGGAGA  CACCGAGGAAGAGGATGAGG |
